# Supplementary material for: A biferrocenium salt containing paramagnetic tetracyanoquinodimethane hexamers: charge disproportionation via donor–acceptor interactions
Source: Royal Society of Chemistry journal article supplement (doi:10.1039/c4cc06888b), 2014-01-01
Supplement: c4cc06888b1.pdf [file c4cc06888b1.pdf]

## Electronic Supplementary Information

# A biferrocenium salt containing paramagnetic tetracyanoquinodimethane hexamers: Charge disproportionation via donor–acceptor interactions

Tomoyuki Mochida,<sup>a\*</sup> Yusuke Funasako,<sup>a,b</sup> Kazuyuki Takahashi,<sup>a</sup> Makoto Inokuchi,<sup>b</sup> Takahiro Sakurai,<sup>c</sup> Shohei Ikeda,<sup>d</sup> Hitoshi Ohta,<sup>e</sup> Hatsumi Mori<sup>f</sup> and Mikio Uruichi<sup>g</sup>

<sup>a</sup>Department of Chemistry, Graduate School of Science, Kobe University, Rokkodai, Nada, Hyogo 657-8501, Japan. E-mail: tmochida@platinum.kobe-u.ac.jp; Fax: +81 78 803 5679; Tel: +81 78 803 5679

<sup>b</sup>Department of Applied Chemistry, Faculty of Engineering, Tokyo University of Science, Yamaguchi, Sanyoonoda, Yamaguchi 756-0884, Japan

<sup>c</sup>Center for Supports to Research and Education Activities, Kobe University, Kobe, Hyogo 657-8501, Japan

<sup>d</sup>Department of Physics, Graduate School of Science, Kobe University, Kobe, Hyogo 657-8501, Japan

<sup>e</sup>Molecular Photoscience Research Center, Kobe University, Kobe, Hyogo 657-8501, Japan

<sup>f</sup>Institute for Solid State Physics, The University of Tokyo, Kashiwanoha, Kashiwa, Chiba 277-8581, Japan

<sup>g</sup>Institute for Molecular Science, Myodaiji, Okazaki, Aichi 444-8585, Japan

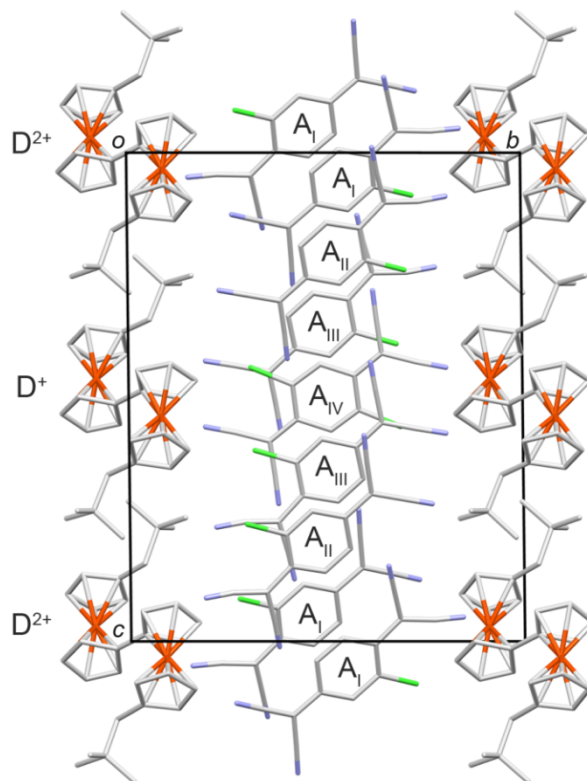

**Fig. S1.** Packing diagram of [dineopentyl-biferrocene]<sub>2</sub>[Cl<sub>1</sub>TCNQ]<sub>7</sub> (**1**) viewed along the *a*-axis.

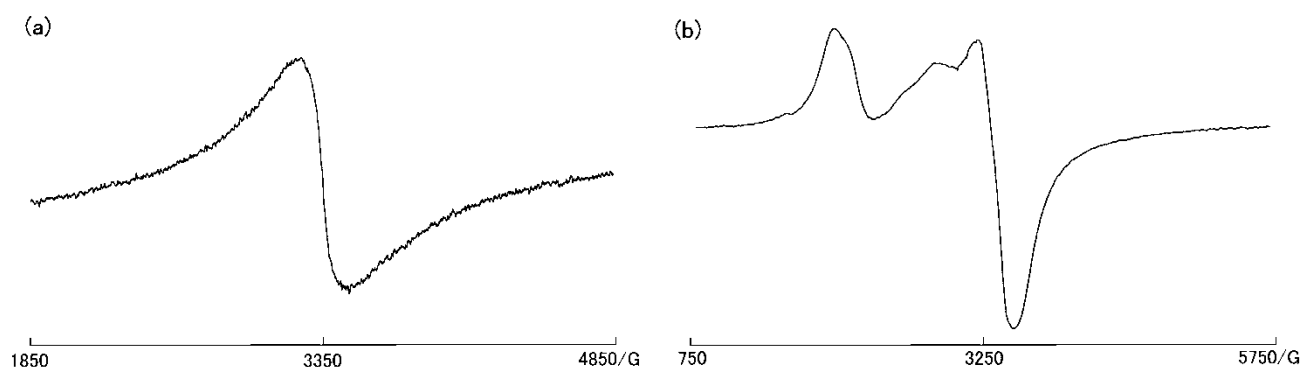

**Fig. S2.** ESR spectra of polycrystalline samples of **1** recorded at (a) room temperature and (b) 77 K.

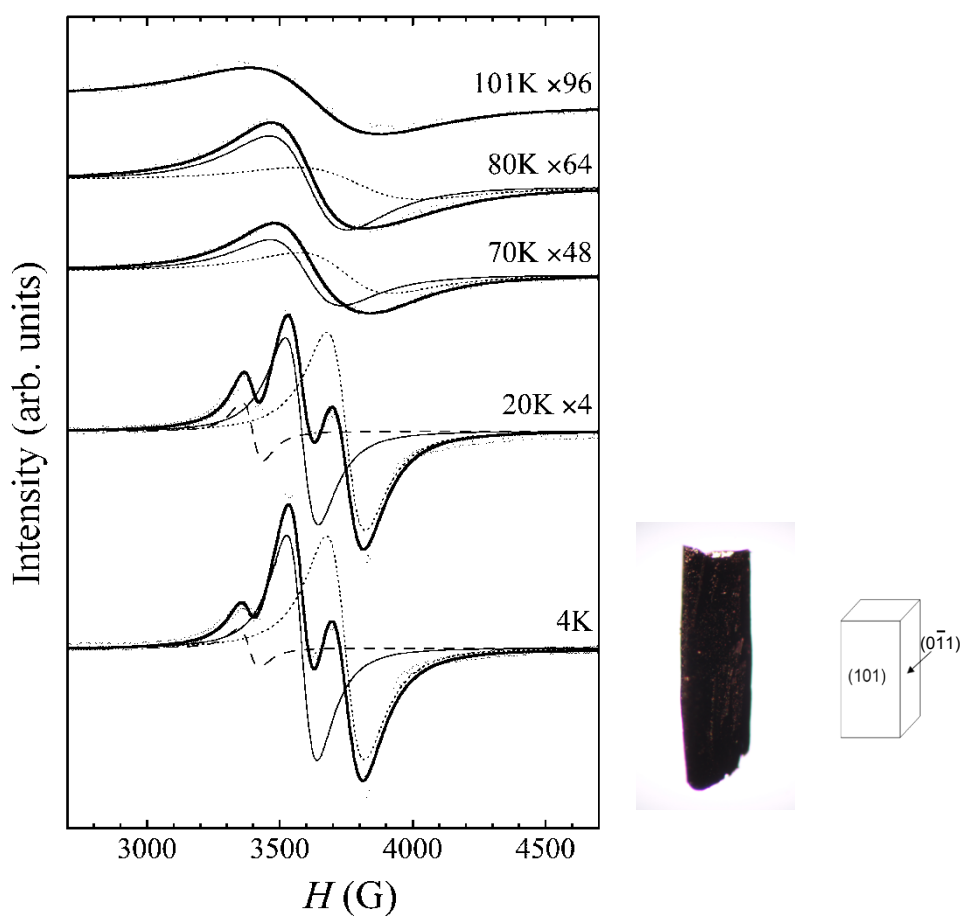

**Fig. S3.** Temperature dependence of the ESR spectra of oriented crystals of **1** recorded under magnetic fields applied normal to the (101) plane. The data points and fitting curves are indicated by circles ( $\circ$ ) and bold lines, respectively. Fitting was done via summation of the TCNQ component (thin line), ferrocenium component (dotted line), and impurity (dashed line). A photograph of a plate-like single crystal of **1** (~0.3 mm length) is shown on the right.

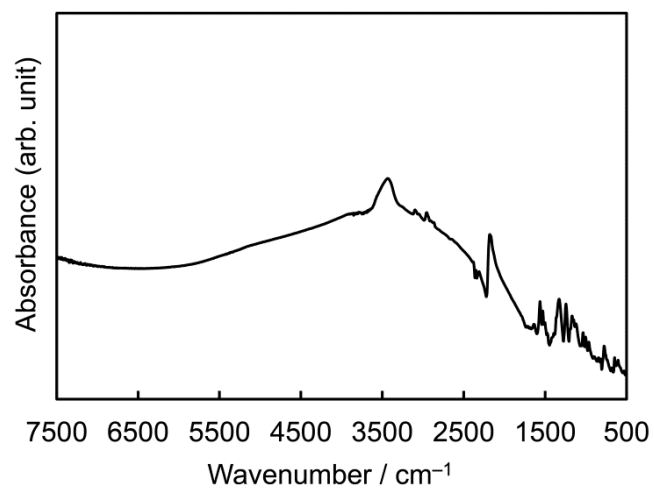

**Fig. S4.** Absorption spectrum of **1** in the NIR-IR region at room temperature (KBr pellet).
